# Supplementary material for: Galvanic-displacement-derived CuO x –Pt/Cu interfaces for operando activation and enhanced HER in acidic media
Source: Royal Society of Chemistry journal article supplement (doi:10.1039/d5dt02961a), 2026-01-01
Supplement: d5dt02961a1.pdf [file d5dt02961a1.pdf]

## Supporting Information

# Galvanic Displacement-Derived CuO<sub>x</sub>-Pt/Cu for *Operando*- *Activation* and Enhanced HER in Acid

Pracheta Trivedi,<sup>a</sup> Sandeep Yadav,<sup>a</sup> Neha Clare Minj,<sup>a</sup> Balakumaran Kamaraj,<sup>a</sup> Sneha Mittal,<sup>a</sup>

Shivani Saraswat,<sup>a</sup> Natarajan Subramanian,<sup>b\*</sup> and Anantharaj Sengeni<sup>a\*</sup>

<sup>a</sup>Laboratory for Electrocatalysis and Energy, Department of Chemistry, Indian Institute of Technology, Kanpur 208 016, Uttar Pradesh, India

<sup>b</sup>Electroplating and Electrometallurgy Division, CSIR-Central Electrochemical Research Institute (CECRI),

\* Correspondence should be addressed to: [snatarajan.cecric@csir.res.in](mailto:snatarajan.cecric@csir.res.in) and [ananths@iitk.ac.in](mailto:ananths@iitk.ac.in)

## Summary of Contents

| S. No | Content | Quantity / Page Number(s) |
|-------|---------|---------------------------|
| 1     | Pages   | 5 (S1-S5)                 |
| 2     | Figures | 4 (Figure S1 – Figure S4) |
| 3     | Tables  | 0                         |

## Table of Contents

| S. No. | Item                                                           | Pages |
|--------|----------------------------------------------------------------|-------|
| 1      | Figure S1: SEM-based ED spectra                                | S2    |
| 2      | Figure S2: TEM image with particle size distribution histogram | S3    |
| 3      | Figure S3: TEM-based ED spectra                                | S4    |
| 4      | Figure S4: SAED patterns                                       | S5    |

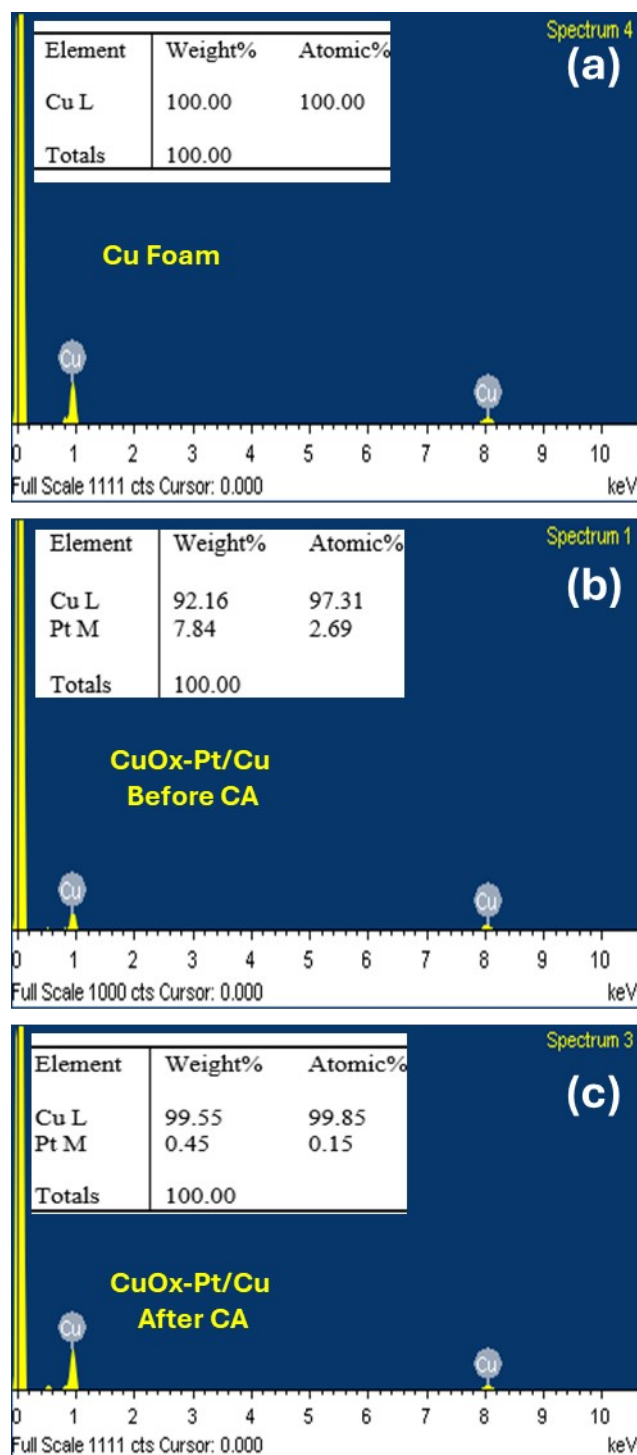

**Figure S1:** SEM-ED spectra of Cu foam (a) and CuO<sub>x</sub>-Pt/Cu before (b) and after (c) CA.

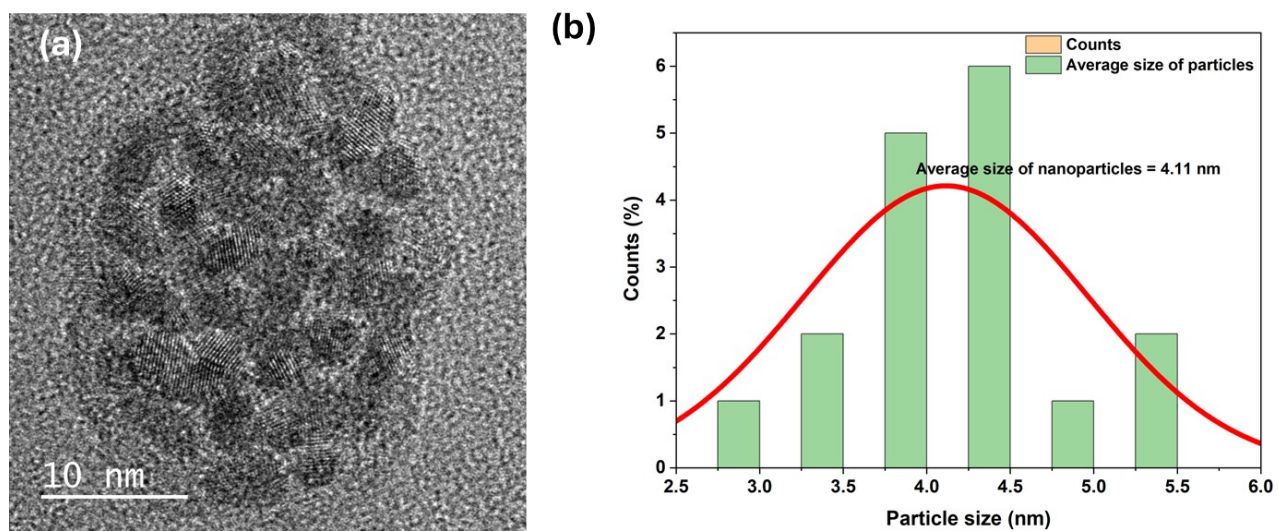

**Figure S2:** TEM image of the surface constituent of  $\text{CuO}_x\text{-Pt/Cu}$  before CA (a) with its particle size distribution histogram (b) as measured using ImageJ.

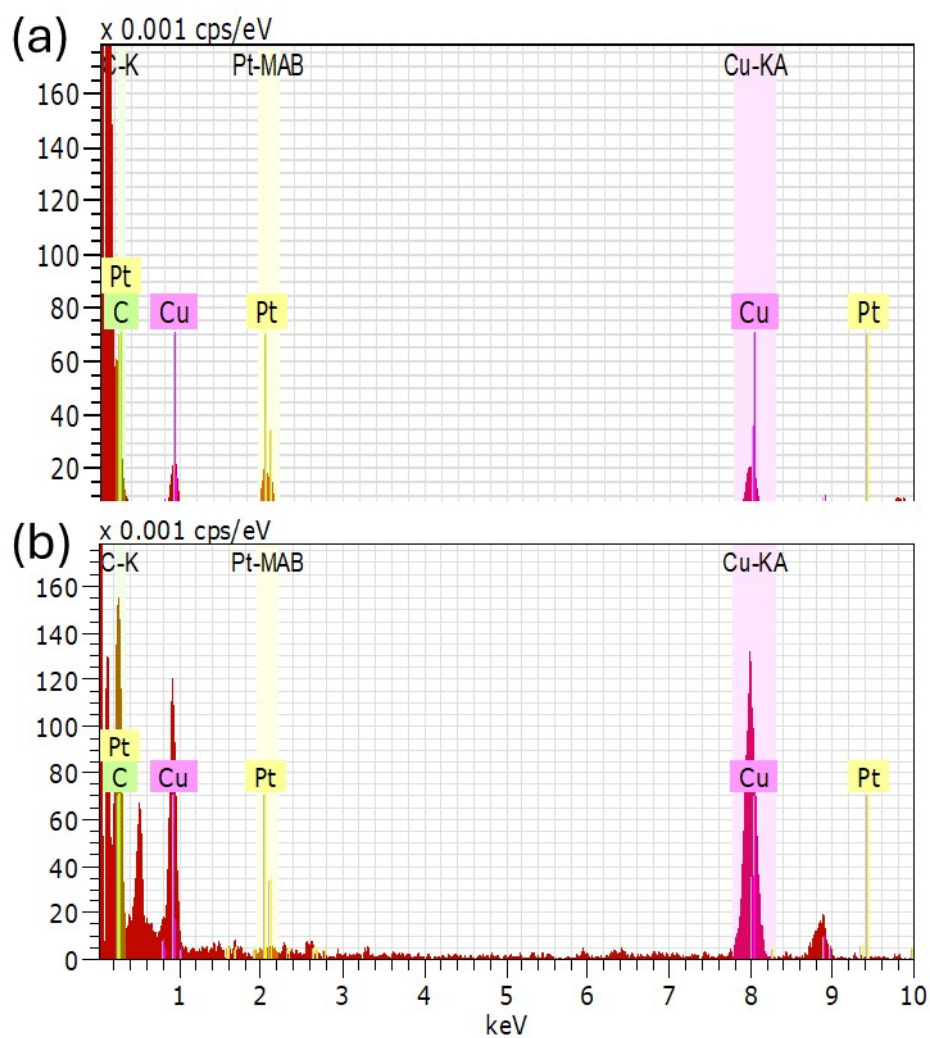

**Figure S3:** STEM-mode EDS spectra of the surface constituents of  $\text{CuO}_x\text{-Pt/Cu}$  before CA (a) and after CA (b).

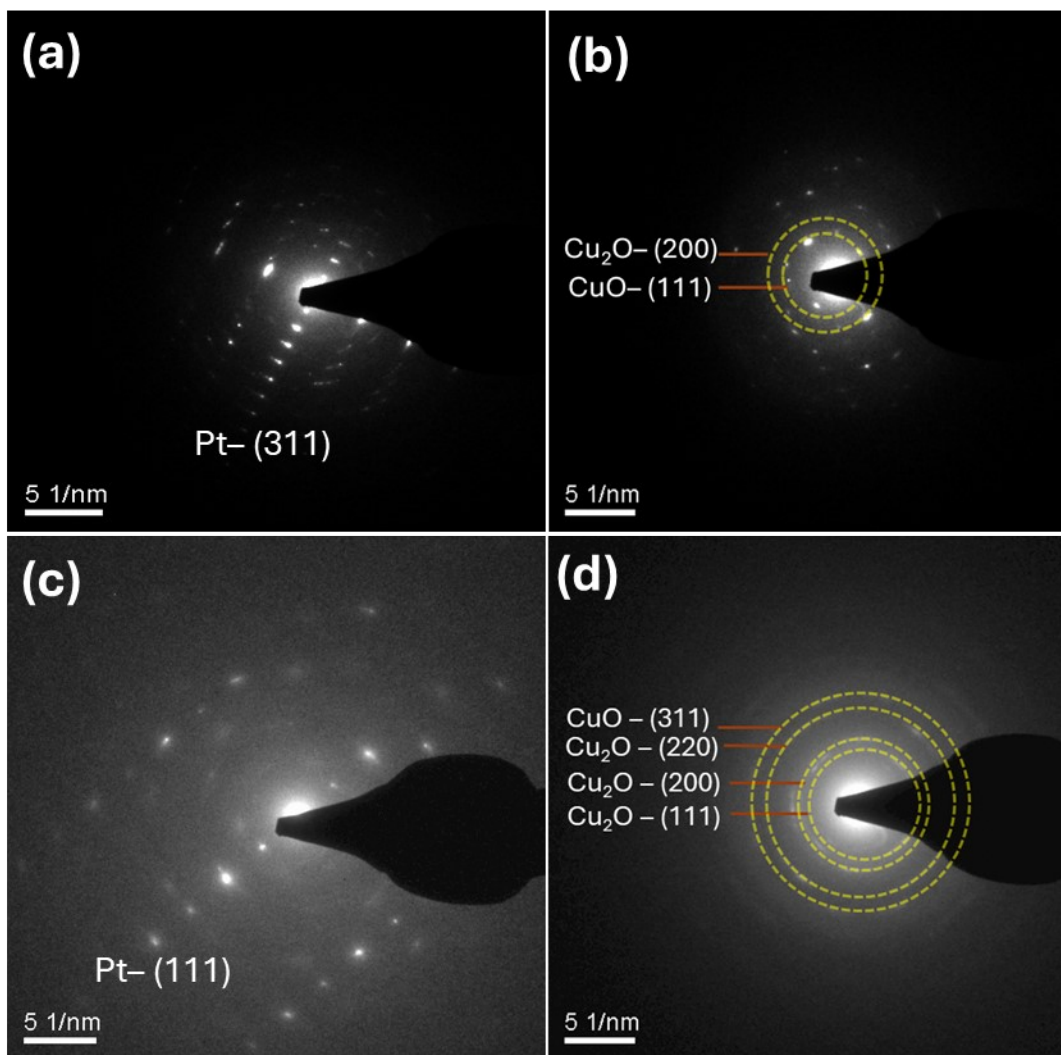

**Figure S4:** TEM-based SAED patterns of the surface constituents of  $\text{CuO}_x\text{-Pt/Cu}$  before CA (a-b) and after CA (c-d), in which (a) and (c) are of the Pt NPs and (b) and (d) are of CuO/Cu<sub>2</sub>O nanosheets.
